# Supplementary material
Source: PubMed Central journal article supplement (PMC6657353)
Supplement: NIHMS1031667-supplement-Appendix_1.pdf [file NIHMS1031667-supplement-Appendix_1.pdf]

Appendix 1 Predicted prevalence rates of overweight and underweight in the transition from childhood to adulthood

| <b>Overweight</b> |             |               |                    |                                |                             |                             |                    |                    |                       |                       |                      |                          |
|-------------------|-------------|---------------|--------------------|--------------------------------|-----------------------------|-----------------------------|--------------------|--------------------|-----------------------|-----------------------|----------------------|--------------------------|
| <b>Age</b>        | <b>Male</b> | <b>Female</b> | <b>High income</b> | <b>Low &amp; medium income</b> | <b>9 years of schooling</b> | <b>6 years of schooling</b> | <b>Urban China</b> | <b>Rural China</b> | <b>Southern China</b> | <b>Northern China</b> | <b>Western China</b> | <b>Non-western China</b> |
| <b>6</b>          | 11.6%       | 10.3%         | 10.8%              | 11.0%                          | 10.4%                       | 11.4%                       | 11.5%              | 10.9%              | 9.6%                  | 14.3%                 | 7.6%                 | 12.8%                    |
| <b>7</b>          | 9.3%        | 8.8%          | 9.5%               | 9.0%                           | 8.6%                        | 9.5%                        | 10.2%              | 8.9%               | 7.3%                  | 13.9%                 | 6.2%                 | 10.7%                    |
| <b>8</b>          | 7.7%        | 7.6%          | 8.4%               | 7.5%                           | 7.2%                        | 7.9%                        | 8.9%               | 7.4%               | 5.7%                  | 13.4%                 | 5.2%                 | 9.0%                     |
| <b>9</b>          | 6.5%        | 6.5%          | 7.6%               | 6.3%                           | 6.1%                        | 6.7%                        | 7.7%               | 6.3%               | 4.6%                  | 12.8%                 | 4.4%                 | 7.7%                     |
| <b>10</b>         | 5.6%        | 5.6%          | 7.0%               | 5.3%                           | 5.3%                        | 5.8%                        | 6.6%               | 5.4%               | 3.7%                  | 12.3%                 | 3.8%                 | 6.6%                     |
| <b>11</b>         | 5.0%        | 4.8%          | 6.5%               | 4.6%                           | 4.7%                        | 5.1%                        | 5.6%               | 4.8%               | 3.1%                  | 11.6%                 | 3.3%                 | 5.8%                     |
| <b>12</b>         | 4.5%        | 4.2%          | 6.2%               | 4.0%                           | 4.2%                        | 4.5%                        | 4.7%               | 4.3%               | 2.7%                  | 11.0%                 | 3.0%                 | 5.2%                     |
| <b>13</b>         | 4.3%        | 3.6%          | 6.0%               | 3.6%                           | 3.8%                        | 4.1%                        | 3.9%               | 4.0%               | 2.4%                  | 10.3%                 | 2.7%                 | 4.7%                     |
| <b>14</b>         | 4.1%        | 3.1%          | 5.9%               | 3.2%                           | 3.5%                        | 3.7%                        | 3.2%               | 3.7%               | 2.2%                  | 9.6%                  | 2.5%                 | 4.3%                     |
| <b>15</b>         | 4.1%        | 2.7%          | 5.9%               | 3.0%                           | 3.3%                        | 3.4%                        | 2.6%               | 3.6%               | 2.1%                  | 8.9%                  | 2.3%                 | 4.0%                     |
| <b>16</b>         | 4.1%        | 2.4%          | 6.0%               | 2.8%                           | 3.2%                        | 3.2%                        | 2.1%               | 3.5%               | 2.0%                  | 8.2%                  | 2.2%                 | 3.8%                     |
| <b>17</b>         | 4.3%        | 2.1%          | 6.2%               | 2.6%                           | 3.1%                        | 3.1%                        | 1.6%               | 3.5%               | 2.0%                  | 7.5%                  | 2.1%                 | 3.6%                     |
| <b>18</b>         | 4.7%        | 1.8%          | 6.5%               | 2.5%                           | 3.0%                        | 3.0%                        | 1.3%               | 3.6%               | 2.0%                  | 6.8%                  | 2.1%                 | 3.6%                     |

  

| <b>Underweight</b> |             |               |                    |                                |                             |                             |                    |                    |                       |                       |                      |                          |
|--------------------|-------------|---------------|--------------------|--------------------------------|-----------------------------|-----------------------------|--------------------|--------------------|-----------------------|-----------------------|----------------------|--------------------------|
| <b>Age</b>         | <b>Male</b> | <b>Female</b> | <b>High income</b> | <b>Low &amp; medium income</b> | <b>9 years of schooling</b> | <b>6 years of schooling</b> | <b>Urban China</b> | <b>Rural China</b> | <b>Southern China</b> | <b>Northern China</b> | <b>Western China</b> | <b>Non-western China</b> |
| <b>6</b>           | 16.0%       | 20.1%         | 15.5%              | 18.3%                          | 18.4%                       | 17.4%                       | 21.4%              | 17.1%              | 19.3%                 | 15.1%                 | 25.3%                | 15.1%                    |
| <b>7</b>           | 18.1%       | 22.1%         | 16.9%              | 20.5%                          | 20.4%                       | 19.4%                       | 21.4%              | 19.5%              | 21.6%                 | 16.6%                 | 27.0%                | 17.2%                    |
| <b>8</b>           | 20.0%       | 23.9%         | 18.1%              | 22.6%                          | 22.2%                       | 21.3%                       | 21.3%              | 21.8%              | 23.7%                 | 18.0%                 | 28.3%                | 19.2%                    |
| <b>9</b>           | 21.6%       | 25.6%         | 19.1%              | 24.4%                          | 23.9%                       | 23.0%                       | 21.1%              | 23.8%              | 25.5%                 | 19.3%                 | 29.4%                | 21.0%                    |
| <b>10</b>          | 22.9%       | 27.0%         | 20.0%              | 25.8%                          | 25.3%                       | 24.3%                       | 21.0%              | 25.6%              | 27.0%                 | 20.4%                 | 30.2%                | 22.5%                    |
| <b>11</b>          | 23.8%       | 28.2%         | 20.7%              | 27.0%                          | 26.3%                       | 25.3%                       | 20.8%              | 26.9%              | 28.1%                 | 21.3%                 | 30.6%                | 23.8%                    |
| <b>12</b>          | 24.3%       | 29.1%         | 21.1%              | 27.7%                          | 27.1%                       | 26.0%                       | 20.6%              | 27.9%              | 28.8%                 | 22.0%                 | 30.8%                | 24.7%                    |
| <b>13</b>          | 24.5%       | 29.7%         | 21.4%              | 28.1%                          | 27.5%                       | 26.2%                       | 20.3%              | 28.3%              | 29.1%                 | 22.4%                 | 30.6%                | 25.2%                    |
| <b>14</b>          | 24.1%       | 29.9%         | 21.4%              | 28.0%                          | 27.5%                       | 26.1%                       | 20.1%              | 28.3%              | 28.9%                 | 22.5%                 | 30.0%                | 25.3%                    |
| <b>15</b>          | 23.4%       | 29.9%         | 21.1%              | 27.5%                          | 27.2%                       | 25.6%                       | 19.8%              | 27.8%              | 28.3%                 | 22.4%                 | 29.2%                | 25.1%                    |
| <b>16</b>          | 22.3%       | 29.6%         | 20.7%              | 26.6%                          | 26.5%                       | 24.7%                       | 19.5%              | 26.9%              | 27.3%                 | 22.0%                 | 28.0%                | 24.4%                    |
| <b>17</b>          | 20.8%       | 28.9%         | 20.0%              | 25.3%                          | 25.5%                       | 23.5%                       | 19.2%              | 25.5%              | 25.9%                 | 21.3%                 | 26.5%                | 23.4%                    |
| <b>18</b>          | 19.1%       | 27.9%         | 19.1%              | 23.7%                          | 24.2%                       | 21.9%                       | 18.8%              | 23.8%              | 24.1%                 | 20.5%                 | 24.9%                | 22.0%                    |
